# Supplementary material
Source: PubMed Central journal article supplement (PMC4058824)
Supplement: NIHMS581608-supplement-01.pdf [file NIHMS581608-supplement-01.pdf]

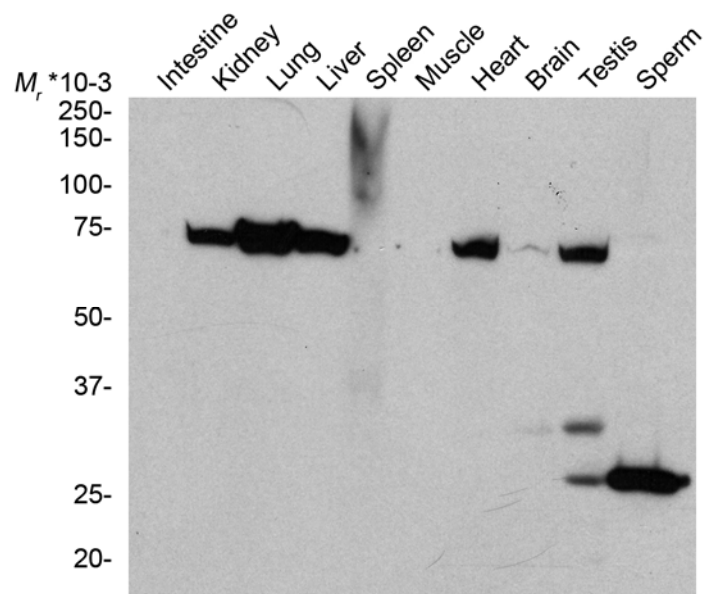

**Supplemental Figure S1**

### **Supplemental Fig. S1: Validation of anti-Capza3 antibody GP-SH4**

Proteins were extracted from different tissues with Laemmli buffer lacking bromophenol-blue and the concentration of total protein assessed by the Bradford method. 50µg of protein from each tissue were loaded and separated by SDS-PAGE and analyzed by western blot with anti-Capza3 GP-SH4 antibody. A 31kDa band corresponding to Capza3 can be observed only in sperm and total testis extracts. Note that that non-specific band at 72kDa is not present in the sperm extract.
